# Supplementary material for: Predicting Choice Behaviour in Economic Games using Gaze Data Encoded as Scanpath Images
Source: Research Square preprint supplement (doi:10.21203/rs.3.rs-2088288/v1), 2022-10-31
Supplement: Supplementary file 1 [file 7764f12c28deb63a38d10a1f.pdf]

## Supplementary material

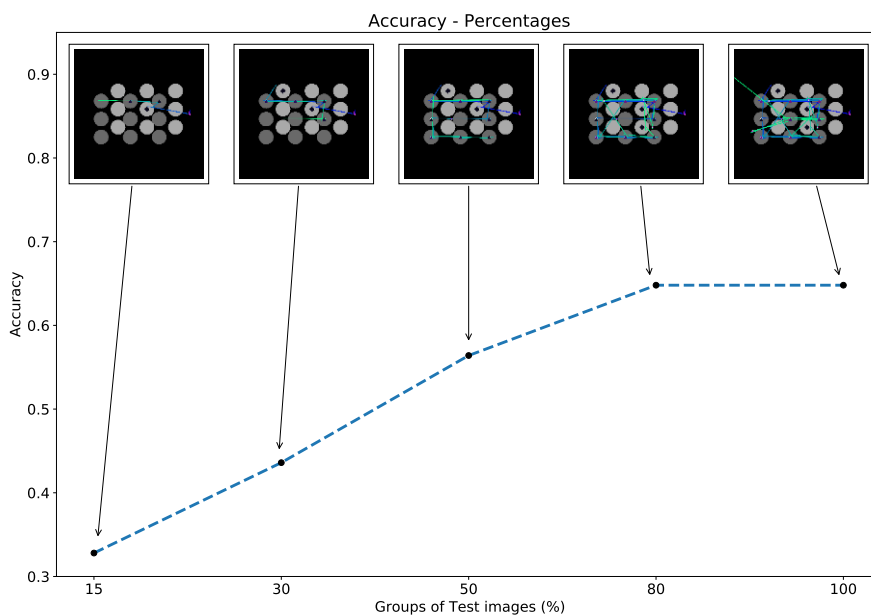

(i)

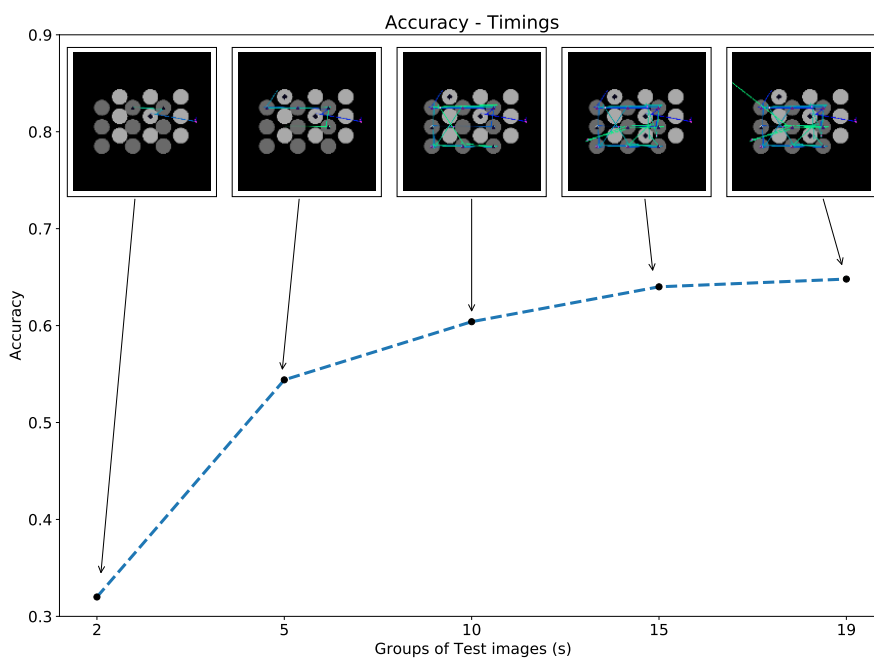

(ii)

**Supplementary Figure 1.** Accuracy of VGG-19 model in Task 2 using subsequence via percentages (5i) and time points (5ii).
